# Supplementary material for: Ratiometric Upconversion Temperature Sensor Based on Cellulose Fibers Modified with Yttrium Fluoride Nanoparticles
Source: MDPI journal article supplement (doi:10.3390/nano12111926), 2022-06-04
Supplement: s1 [file s1]

## Supplementary materials for:

# Ratiometric upconversion temperature sensor based on cellulose fibers modified with yttrium fluoride nanoparticles

Małgorzata Skwierczyńska <sup>1,\*</sup>, Natalia Stopikowska <sup>1</sup>, Piotr Kulpiński <sup>2</sup>, Magdalena Kłowska <sup>3</sup>, Stefan Lis <sup>1</sup> and Marcin Runowski <sup>1,4</sup>

<sup>1</sup> Adam Mickiewicz University, Faculty of Chemistry, Department of Rare Earths, Uniwersytetu Poznańskiego 8, 61-614 Poznań, Poland, natalia.stopikowska@amu.edu.pl (N.S.); blis@amu.edu.pl (S.L.)

<sup>2</sup> Lodz University of Technology, Faculty of Material Technologies and Textile Design, Department of Mechanical Engineering, Informatics and Chemistry of Polymer Materials, Żeromskiego 116, 90-924 Łódź, Poland, piotr.kulpinski@p.lodz.pl (P.K.)

<sup>3</sup> Lodz University of Technology, Faculty of Material Technologies and Textile Design, Department of Knitting Technology and Textile Machines, Żeromskiego 116, 90-924 Łódź, Poland, magdalena.klonowska@p.lodz.pl (M.K.)

<sup>4</sup> Universidad de La Laguna, Departamento de Física, Apdo. Correos 456, E-38200, San Cristóbal de La Laguna, Santa Cruz de Tenerife, Spain, mrunowsk@ull.edu.es (M.R.)

\* Correspondence: malgorzata.skwierczynska@amu.edu.pl; (M.S.)

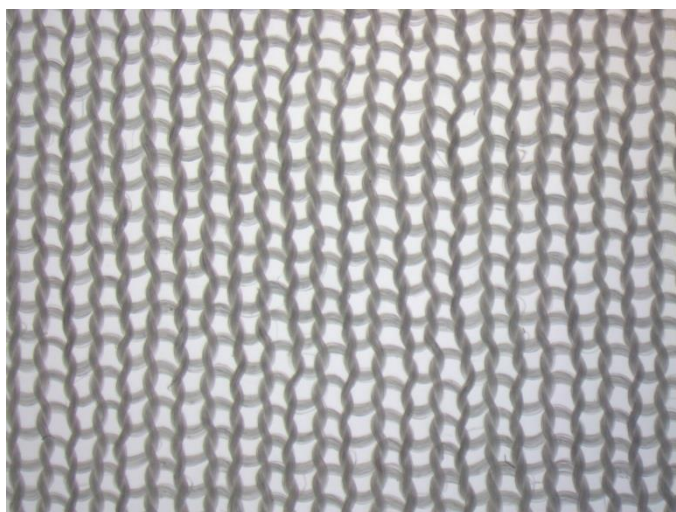

**Figure S1** Right side of the knitted fabric

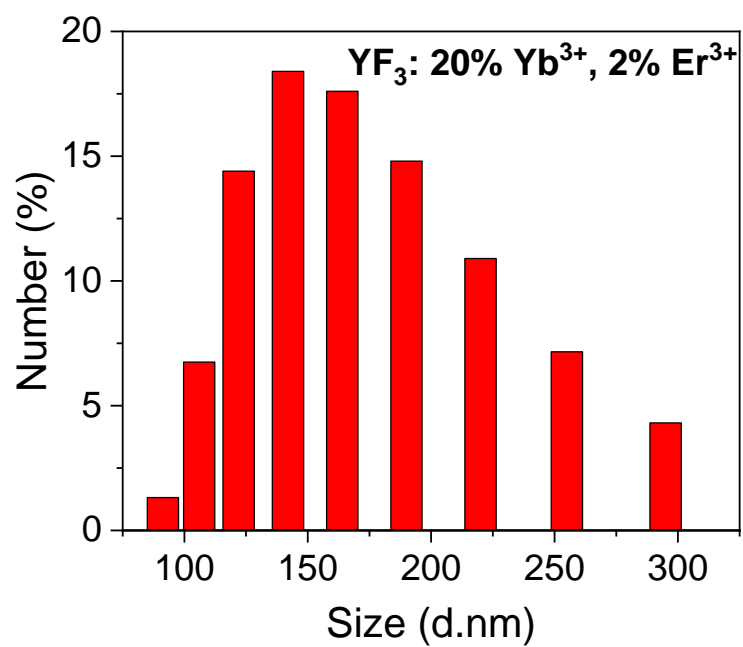

Figure S2 DLS analysis of YF<sub>3</sub>: 20 % Yb<sup>3+</sup>, 2 % Er<sup>3+</sup> NPs.

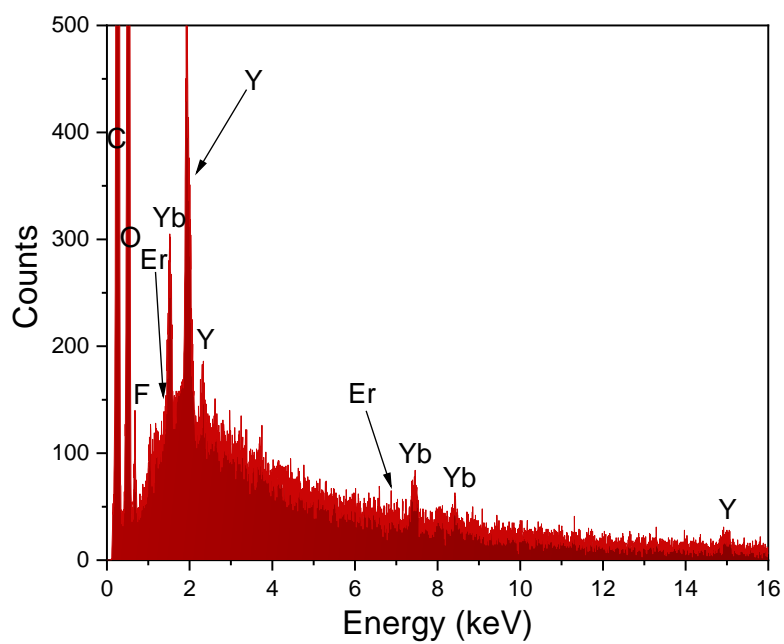

Figure S3 EDX spectra of YF<sub>3</sub>-modified cellulose fibers.

**Table S1** Basic structural and physical parameters of a knitted fabric made of YF<sub>3</sub>-modified cellulose fibers.

|                       | Number of wales<br>[wale/cm] | Number of<br>courses<br>[course/cm] | Fabric<br>thickness<br>[mm] | Mas per unit area<br>[g/m <sup>2</sup> ] |
|-----------------------|------------------------------|-------------------------------------|-----------------------------|------------------------------------------|
| Mean value            | 10.0                         | 14.0                                | 0.67                        | 125.0                                    |
| Standard<br>deviation | 0.52                         | 0.48                                | 0.01                        | 2.57                                     |

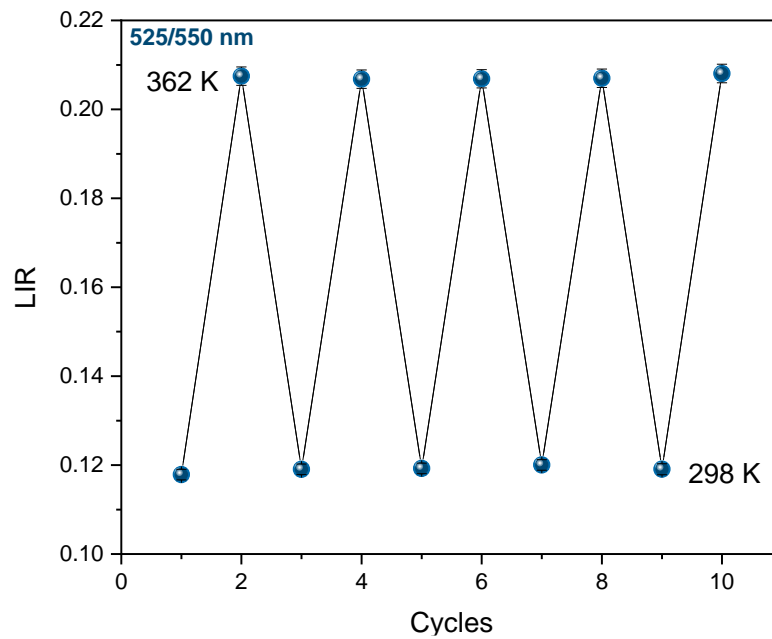

**Figure S4** Thermal cycling of YF<sub>3</sub>-modified fibers between 298 K and 362 K, for the determined thermometric parameters, i.e. Er<sup>3+</sup>: 525/550 nm band ratio,  $\lambda_{\text{ex}}$  = 975 nm.
